# Supplementary material for: A (3,8)-connected metal–organic framework with a unique binuclear [Ni2(μ2-OH)(COO)2] node for high H2 and CO2 adsorption capacities
Source: Royal Society of Chemistry journal article supplement (doi:10.1039/c5ta03493k), 2015-01-01
Supplement: c5ta03493k1.pdf [file c5ta03493k1.pdf]

## Supporting Information

### **A (3,8)-connected metal-organic framework with a unique binuclear $[\text{Ni}_2(\mu_2\text{-OH})(\text{COO})_2]$ node for high $\text{H}_2$ and $\text{CO}_2$ adsorption capacities**

Lei Zhang,<sup>ab</sup> Jinjie Qian,<sup>a</sup> Wenbin Yang,<sup>a</sup> Xiaofei Kuang,<sup>a</sup> Jun Zhang,<sup>a</sup> Yixin Cui,<sup>a</sup>  
Weiming Wu,<sup>a</sup> Xiao-Yuan Wu,<sup>a</sup> Can-Zhong Lu<sup>\*a</sup> and Wen-Zhe Chen<sup>\*bc</sup>

<sup>a</sup>*Key Laboratory of Design and Assembly of Functional Nanostructures, Fujian Institute of Research on the Structure of Matter, Chinese Academy of Sciences, Fuzhou, Fujian 350002, P. R. China.*

*E-mail: czlu@fjirsm.ac.cn; Fax: (+86)591-83714946*

<sup>b</sup>*College of Materials Science and Engineering, Fuzhou University, Fuzhou, Fujian 350116, P. R. China.*

*E-mail: chenwz@fzu.edu.cn; Fax: (+86)591-22866538*

<sup>c</sup>*Xiamen University of Technology, Xiamen, Fujian 361024, P. R. China.*

**I: *Experimental Section;***

**II: *Crystallographic Study;***

**III: *Physical Measurements;***

**IV: *Additional Figures and Descriptions;***

**V: *References.***

## ***Experimental Section***

### **General procedure**

The ligand tris-(4-pyridyl)-1,3,5-triazine (tpt) was synthesized according to the literature method.<sup>1</sup> The other solvents and reagents were purchased from commercial sources and used without purification. Infrared (IR) spectra were recorded on a Vertex 70 using KBr pallets. Elemental analyses of (C, H and N) were carried out with a Vario EL III elemental analyzer. Thermogravimetric analysis (TGA) was performed with a TGA/DSC 1 STAR<sup>e</sup> system at a heating rate of 5 °C/min under nitrogen atmosphere. Powder X-ray diffraction (PXRD) measurements were carried out at room temperature on a Rigaku MiniFlex600 diffractometer using Cu  $K\alpha$  radiation ( $\lambda = 0.154$  nm). *In situ* variable temperature PXRD patterns were recorded on a Rigaku Ultima IV diffractometer. Single component gas adsorption measurements were collected in the Accelerated Surface Area and Porosimetry 2020 System (ASAP2020).

### **Synthesis procedure**

#### **Synthesis of $[\text{Ni}_2(\mu_2\text{-OH})(\text{bpdc})(\text{tpt})_2][\text{NO}_3] \cdot 3\text{DMA} \cdot 4\text{CH}_3\text{OH} \cdot 6\text{H}_2\text{O}$ (**1**)**

$\text{Ni}(\text{NO}_3)_2 \cdot 6\text{H}_2\text{O}$  (0.034 g, 0.12 mmol), tpt (0.034 g, 0.11 mmol) and  $\text{H}_2\text{bpdc}$  (0.014 g, 0.06 mmol) were added in the solvent mixture of N,N-dimethylacetamide (DMA, 5 mL)/methanol ( $\text{CH}_3\text{OH}$ , 5 mL) solvent in a 20 mL screw-capped vial, then 100  $\mu\text{L}$   $\text{HBF}_4$  (Tetrafluoroboric acid, 40% in water) was added into the solution and the mixture was sonicated for 30 min. Finally, the mixture was sealed and heated to 85 °C for 5 days. The green block crystals of **1** were filtered and washed with DMA, then washed with ethanol three times and dried in the air. (Yield: 68.2% based on nickel). Elemental analysis: Calcd. (Found %) For  $\text{C}_{66}\text{H}_{88}\text{N}_{16}\text{Ni}_2\text{O}_{21}$  **1**: C, 50.80 (50.61); H, 5.64 (5.74); N, 14.37 (14.22).

## Crystallographic Study

Crystallographic data of **1** was collected on a Saturn 70 diffractometer equipped with graphite-monochromated Mo K $\alpha$  radiation ( $\lambda=0.71073$  Å) at 100 K. The CrystalClear program was used for the absorption correction. The structure was solved by direct methods and refined on  $F^2$  by full-matrix, least-squares methods using the SHELXL-97 program package.<sup>2</sup> All non-hydrogen atoms were refined anisotropically. The hydrogen atoms for the ligands were placed in calculated positions and treated as riding on their parents, while the hydrogen atoms of the  $\mu_2$ -OH hydroxyl groups were not included in the model. It should be noted here that there are many disordered charge-balancing NO<sub>3</sub><sup>-</sup> counter anions lying inside the extra-large solvent accessible interspaces, which lead to the final charge equilibrium. One NO<sub>3</sub><sup>-</sup> anion per formula unit was suggested by elemental analysis and thermogravimetric analysis. The contributions of disordered solvent molecules and the charge-balancing NO<sub>3</sub><sup>-</sup> anions were treated as diffuse using the SQUEEZE procedure implemented in PLATON,<sup>3</sup> subsequently a set of solvent-free diffraction intensities was produced. The final formula of **1** was figured out based on the SQUEEZE results, elemental analysis data and TGA data. A summary of crystallographic refinement details for **1** were given in table S1. Complete details can be found in the accompanying cif file. The following crystal structure has been deposited at the Cambridge Crystallographic Data Centre and the CCDC number (1061092) is for **1**.

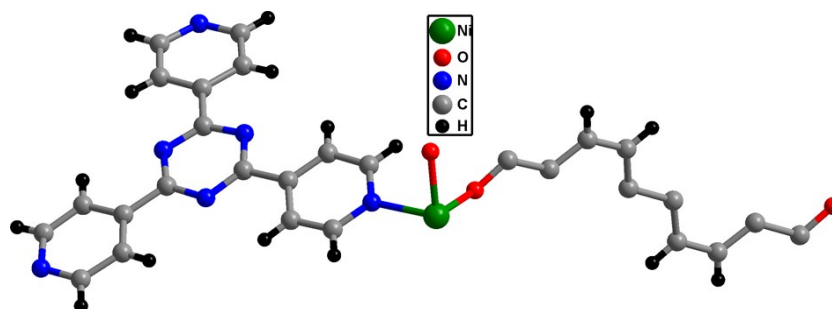

Fig. S1 The asymmetric unit of **1**.

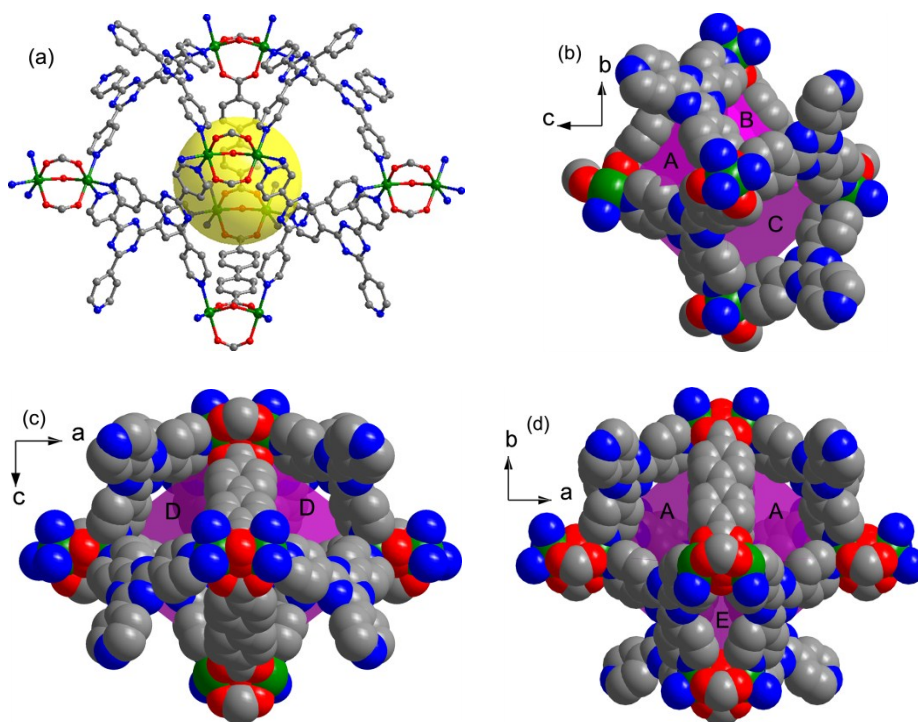

Fig. S2 (a) The irregular octahedral cage with a cavity diameter of about 6.0 Å. (b) Views of the irregular octahedral cage with three types of small windows (A:  $\sim 9.3 \times 9.5$  Å; B:  $\sim 8.1 \times 8.2$  Å and C:  $\sim 9.3 \times 10.6$  Å) along the *a* axis. (c) Views of the irregular octahedral cage with a small windows (D:  $\sim 9.6 \times 9.7$  Å) along the *b* axis. (d) Views of the irregular octahedral cage with two kinds of small windows (E:  $\sim 6.5 \times 8.2$  Å and A:  $\sim 9.3 \times 9.5$  Å) along the *c* axis.

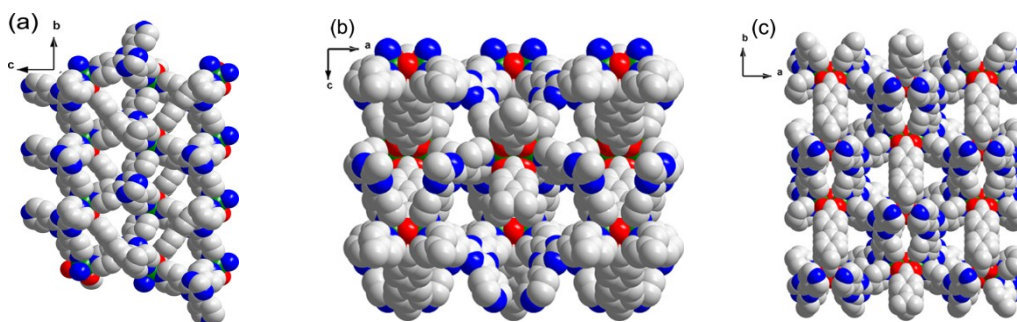

Fig. S3 Views of the 3D framework of **1** along three crystallographic axes.

Table S1 Summary of Crystal Data and Structure Refinement for **1**.

|                                   | <b>1</b>                                                                                  |
|-----------------------------------|-------------------------------------------------------------------------------------------|
| Empirical formula                 | C <sub>66</sub> H <sub>88</sub> N <sub>16</sub> Ni <sub>2</sub> O <sub>21</sub>           |
| Formula weight                    | 1558.94                                                                                   |
| Temperature                       | 153 (2) K                                                                                 |
| Wavelength                        | 0.71073 Å                                                                                 |
| Crystal system, space group       | Orthorhombic, Cmc2 <sub>1</sub>                                                           |
| Unit cell dimensions              | a = 24.345 (4) Å    α = 90°<br>b = 20.477 (3) Å    β = 90°<br>c = 19.098 (3) Å    γ = 90° |
| Volume                            | 9521 (3) Å <sup>3</sup>                                                                   |
| Z                                 | 4                                                                                         |
| Density (calculated)              | 1.067 g/cm <sup>3</sup>                                                                   |
| Absorption coefficient            | 0.460 mm <sup>-1</sup>                                                                    |
| F (000)                           | 3224                                                                                      |
| Crystal size                      | 0.25 × 0.25 × 0.20 mm                                                                     |
| Theta range for data collection   | 2.26° to 27.50°                                                                           |
| Index ranges                      | -28 ≤ h ≤ 31<br>-24 ≤ k ≤ 25<br>-24 ≤ l ≤ 24                                              |
| Reflections collected / unique    | 29797 / 10913 [R(int) = 0.0168]                                                           |
| Absorption correction             | Multi-scan                                                                                |
| Refinement method                 | Full-matrix least-squares on F <sup>2</sup>                                               |
| Data / restraints / parameters    | 10913 / 1 / 321                                                                           |
| Goodness-of-fit on F <sup>2</sup> | 1.062                                                                                     |
| Final R indices [I > 2σ(I)]       | R <sub>1</sub> = 0.0298, wR <sub>2</sub> = 0.0828                                         |
| R indices (all data)              | R <sub>1</sub> = 0.0307, wR <sub>2</sub> = 0.0836                                         |
| Largest diff. peak and hole       | 0.530 and -0.345 e·Å <sup>-3</sup>                                                        |

## Physical Measurements

### Infrared measurements

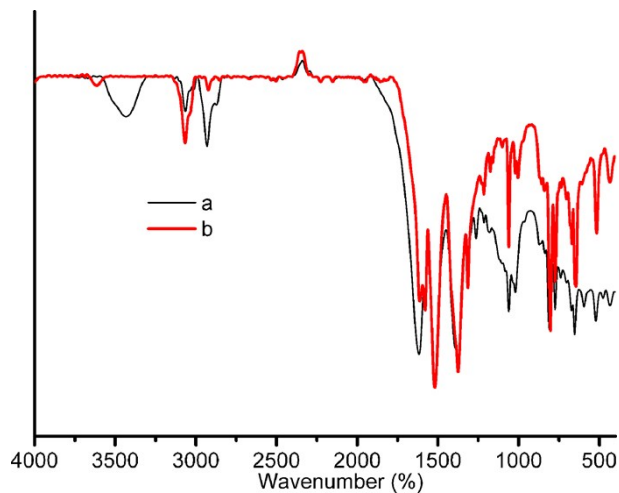

Fig. S4 The IR spectra of **1** recorded at room temperature under room atmosphere (a) and after losing of solvent water molecules during 2 h under vacuum at 200 °C (b). The IR peak of the  $\mu_2$ -OH hydroxyl group of **1** is at 3612  $\text{cm}^{-1}$  after the loss of solvent water molecules (b), and the  $\nu(\text{OH})$  mode is shifted to 3430  $\text{cm}^{-1}$  when the hydroxyl group is involved in hydrogen bond interaction with the trapped water molecules (a).<sup>4</sup>

### Thermogravimetric analysis

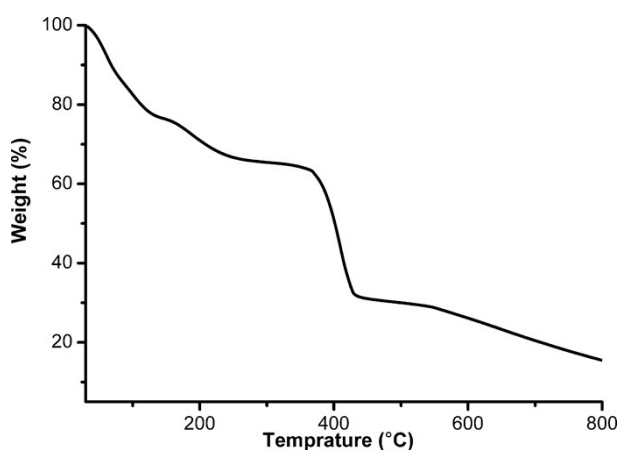

Fig. S5 TGA curve of **1**.

## Powder X-ray diffraction

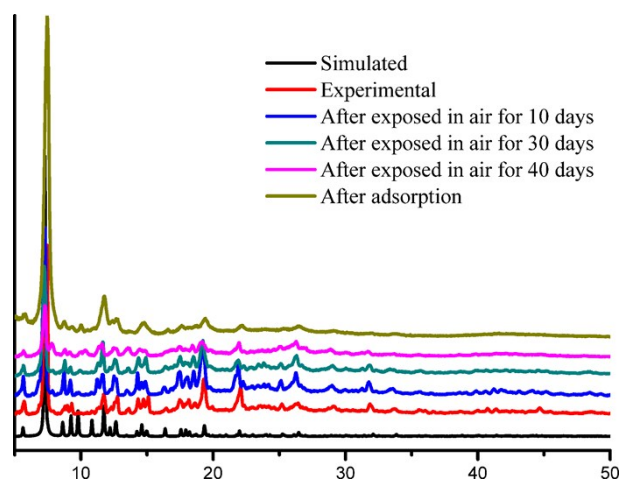

Fig. S6 The PXRD patterns of **1** obtained in different conditions.

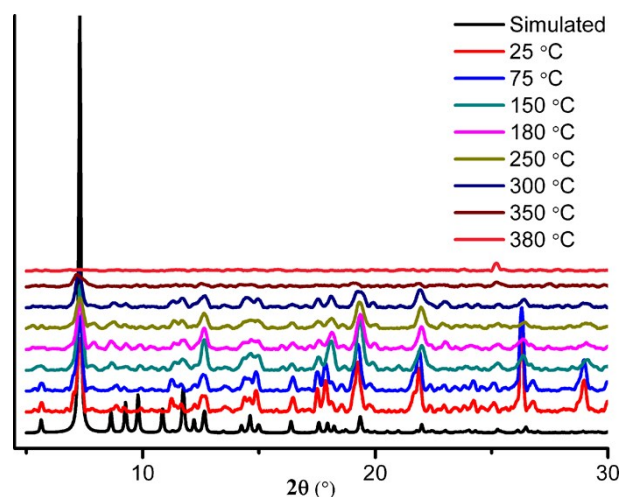

Fig. S7 *In situ* variable temperature PXRD patterns for **1** under room atmosphere.

## Gas adsorption measurements

A Micromeritics (Accelerated Surface Area and Porosimetry) 2020 System was used to measure gas adsorption. In order to remove the nonvolatile solvates, the fresh samples of **1** were soaked in acetone for 3 days and the soaking solution was replaced by fresh acetone every 12 hours, and then degassed under dynamic vacuum at 100 °C for 10 hours to obtain the completely activated samples **1a**. The N<sub>2</sub> and H<sub>2</sub> gas

adsorption isotherms were measured at 77 K or 87 K using a liquid N<sub>2</sub> or Ar bath, respectively. In addition, the CO<sub>2</sub>, CH<sub>4</sub> and N<sub>2</sub> adsorption isotherms were measured at 273 K, 283 K and 295 K, and the temperature was held constant using an ice water bath or water bath.

### Isosteric heats of adsorption ( $Q_{st}$ )

The isosteric heats of adsorption ( $Q_{st}$ ) for H<sub>2</sub> and CO<sub>2</sub> was fitted by a virial method (1)<sup>5</sup> using the H<sub>2</sub> adsorption isotherms (77 K and 87 K) and the CO<sub>2</sub> isotherms (273, 283 and 295 K), respectively, and then calculated by using the Clausius-Clapeyron equation (2).

$$\ln P = \ln N + 1/T \sum_{i=0}^m a_i N^i + \sum_{j=0}^n b_j N^j \quad (1)$$

$$Q_{st} = -R \sum_{i=0}^m a_i N^i \quad (2)$$

Where  $P$  is pressure (mmHg),  $N$  is the amount adsorbed quantity (mmol g<sup>-1</sup>),  $T$  is the temperature (K),  $a_i$  and  $b_i$  are virial coefficients,  $R$  is the real gas constant, and  $m$ ,  $n$  represent the number of coefficients required to adequately describe the isotherms.

### Prediction of the gases adsorption selectivity by IAST

IAST (ideal adsorption solution theory)<sup>6</sup> was used to predict binary mixture adsorption from the experimental pure-gas isotherms. For CO<sub>2</sub>, CH<sub>4</sub> and N<sub>2</sub> isotherms of **1a** in the low pressure, the experimental isotherm data (measured at 273 and 295 K) were fitted using the single-site Langmuir-Freundlich equation (3).

$$q = \frac{q_{sat} b p^c}{1 + b p^c} \quad (3)$$

Where,  $b$  is the parameter in the pure component Langmuir isotherm (kPa<sup>-1</sup>),  $p$  is bulk gas phase pressure of species (kPa),  $q$  is the adsorbed amount of adsorbent (mmol g<sup>-1</sup>),



$q_{\text{sat}}$  is saturation capacity of species ( $\text{mmol g}^{-1}$ ),  $c$  is constant.

The adsorption selectivities ( $S_{\text{ads}}$ ) for binary mixtures of  $\text{CO}_2/\text{CH}_4$  and  $\text{CO}_2/\text{N}_2$ , defined by

$$S_{\text{ads}} = \frac{x_1 / x_2}{y_1 / y_2} \quad (4)$$

Where  $x_i$  is the mole fractions of component  $i$  in the adsorbed phases and  $y_i$  is the mole fractions of component  $i$  in the bulk phases.

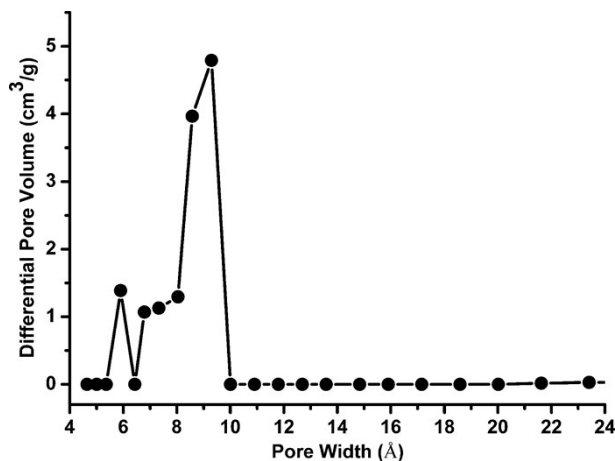

Fig. S8 The pore size distribution of **1a** calculated by density functional theory method.

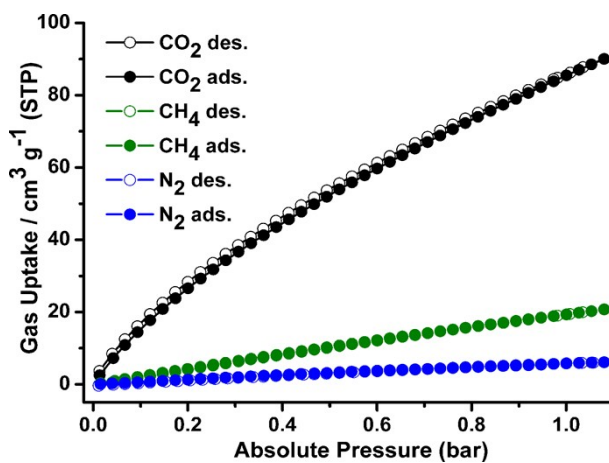

Fig. S9  $\text{CO}_2$ ,  $\text{CH}_4$  and  $\text{N}_2$  adsorption isotherms of **1a** at 283 K.

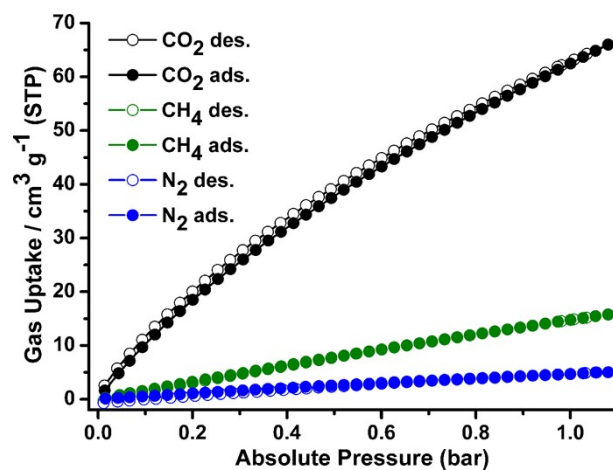

Fig. S10 CO<sub>2</sub>, CH<sub>4</sub> and N<sub>2</sub> adsorption isotherms of **1a** at 295 K.

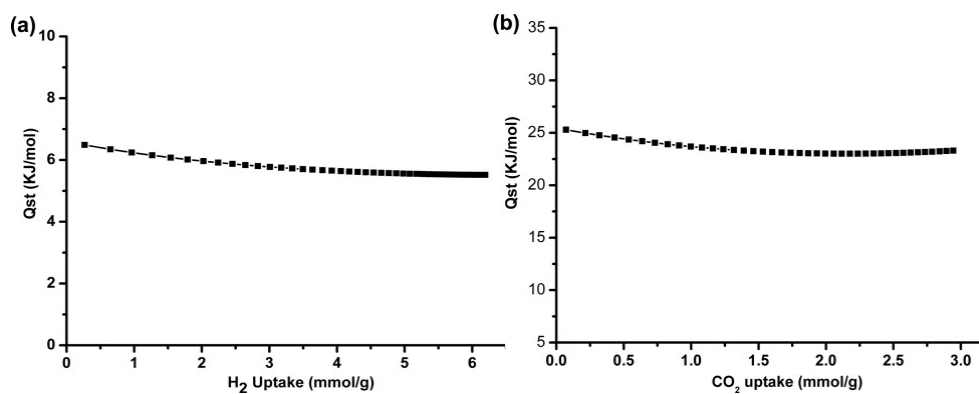

Fig. S11 The isosteric heats of adsorption ( $Q_{st}$ ) of H<sub>2</sub> (a) and CO<sub>2</sub> (b) calculated by the virial method for **1a**.

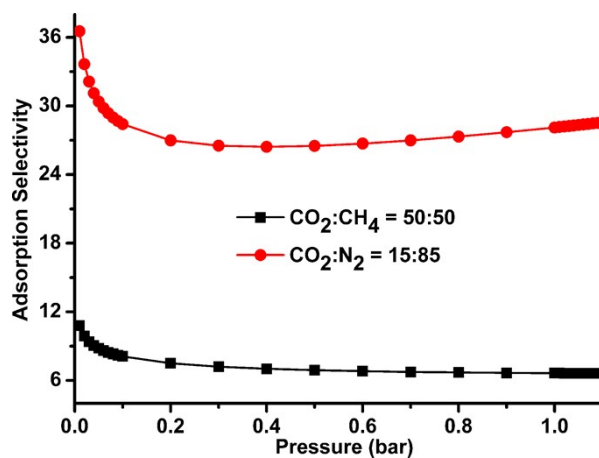

Fig. S12 IAST calculations of CO<sub>2</sub>/CH<sub>4</sub> and CO<sub>2</sub>/N<sub>2</sub> adsorption selectivities for **1a** at 295 K.

## Additional Figures and Descriptions

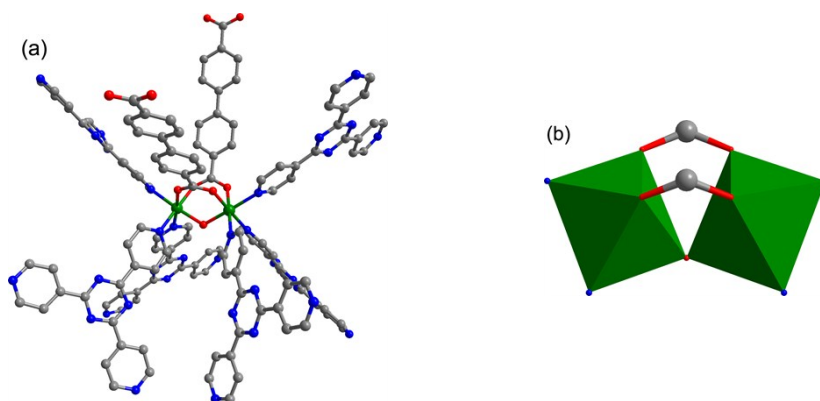

Fig. S13 (a) The coordination environment of the binuclear  $[\text{Ni}_2(\mu_2\text{-OH})(\text{COO})_2]$  node. (b) A pair of adjacent Ni(II) octahedral with sharing a bridging  $\mu_2\text{-OH}$  hydroxyl group.

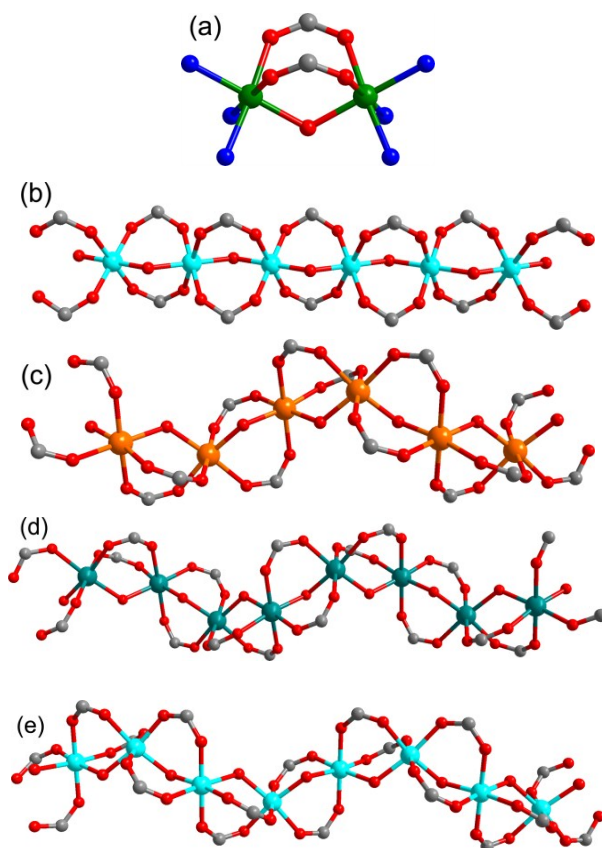

Fig. S14 The binuclear  $[\text{Ni}_2(\mu_2\text{-OH})(\text{COO})_2]$  SBU in **1** (a). View of the infinite 1-periodic binuclear  $[\text{M}_2(\mu_2\text{-OH})(\text{COO})_2]$  SBUs in MIL-53 (b), NOTT-400 (c), InOF-1 (d), NOTT-300 (e).<sup>7</sup> (C, gray; N, blue; O, red; Ni, green; Al, turquoise; Sc, orange; In, teal).

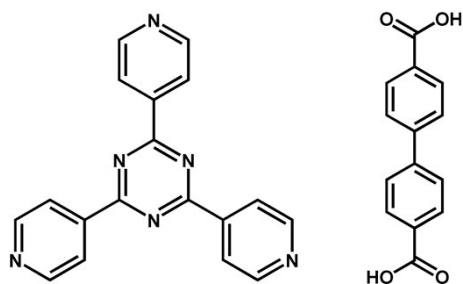

Fig. S15 Structures of the organic ligands tpt and H<sub>2</sub>bpdc.

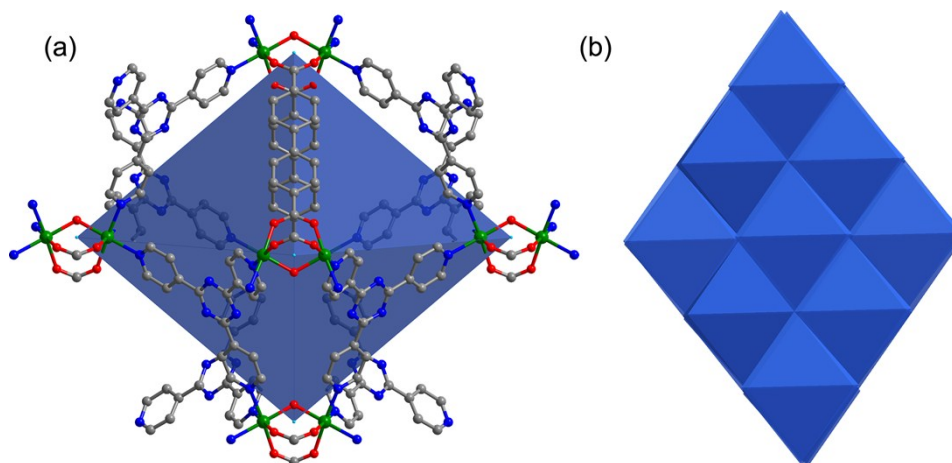

Fig. S16 (a) Six [Ni<sub>2</sub>(μ<sub>2</sub>-OH)(COO)<sub>2</sub>] SBUs are bonded together by two bpdc<sup>2-</sup> ligands and eight tpt ligands to form an irregular octahedral cage in **1**. (b) View of the ABAB octahedral cage packing in the 3D framework of **1**.

### Bond valence sum (BVS) analysis for **1**

The bond-valence model based on the Brown equation (5)<sup>8</sup> was applied to assess the oxidation state of the nickel ions and bridging oxygen atoms in **1**, and the results of the calculations are shown in Table S2.

$$V_i = \sum_j V_{ij} = \sum_j \exp\left(\frac{r_o - r_{ij}}{B}\right) \quad (5)$$

Where  $V_i$  is the atom valence of a given atom,  $i$ , which is equal to the sum of all bond valences of the bonds formed by the given atom,  $i$ .  $V_{ij}$  is the valence of a bond between two atoms,  $i$  and  $j$ .  $r_o$  is an empirical parameter determined for pairs of atoms.  $r_{ij}$  is the bond length between atoms  $i$  and  $j$ . In this work,  $i$  and  $j$  are Ni and O or Ni and N.  $B$  is a constant, the “universal parameter”  $\sim 0.370$  Å.

Table S2 BVS Calculation for **1**.

| Ni <sup>2+</sup>                                                                              | $r_0$ | $r_{ij}$    | $B$   | $V_{ij}$ |
|-----------------------------------------------------------------------------------------------|-------|-------------|-------|----------|
| Ni1—O1                                                                                        | 1.670 | 1.9797 (6)  | 0.370 | 0.433    |
| Ni1—O3 <sup>i</sup>                                                                           | 1.670 | 2.0392 (9)  | 0.370 | 0.369    |
| Ni1—O2                                                                                        | 1.670 | 2.0501 (11) | 0.370 | 0.358    |
| Ni1—N1                                                                                        | 1.647 | 2.0918 (12) | 0.370 | 0.301    |
| Ni1—N3 <sup>ii</sup>                                                                          | 1.647 | 2.1076 (11) | 0.370 | 0.288    |
| Ni1—N2 <sup>iii</sup>                                                                         | 1.647 | 2.1337 (13) | 0.370 | 0.268    |
| $V_{Ni} = \Sigma V_{ij} = 2.017$ ; $V_{O1} = 2 \times V_{Ni1-O1} = 0.866$                     |       |             |       |          |
| Ni <sup>3+</sup>                                                                              | $r_0$ | $r_{ij}$    | $B$   | $V_{ij}$ |
| Ni1—O1                                                                                        | 1.750 | 1.9797 (6)  | 0.370 | 0.538    |
| Ni1—O3 <sup>i</sup>                                                                           | 1.750 | 2.0392 (9)  | 0.370 | 0.458    |
| Ni1—O2                                                                                        | 1.750 | 2.0501 (11) | 0.370 | 0.444    |
| Ni1—N1                                                                                        | 1.731 | 2.0918 (12) | 0.370 | 0.377    |
| Ni1—N3 <sup>ii</sup>                                                                          | 1.731 | 2.1076 (11) | 0.370 | 0.361    |
| Ni1—N2 <sup>iii</sup>                                                                         | 1.731 | 2.1337 (13) | 0.370 | 0.337    |
| $V_{Ni} = \Sigma V_{ij} = 2.515$ ; $V_{O1} = 2 \times V_{Ni1-O1} = 1.076$                     |       |             |       |          |
| Symmetry codes: (i) $-x, -y-1, z-1/2$ ; (ii) $x, -y, z+1/2$ ; (iii) $-x+1/2, -y-1/2, z+1/2$ . |       |             |       |          |

Table S3 Selected Bond Lengths (Å) and Angles (°) for **1**.

| Bond                | Distance (Å) |                         |            |
|---------------------|--------------|-------------------------|------------|
|                     |              | O3 <sup>i</sup> —Ni1—N1 | 86.93 (5)  |
| Ni1—O1              | 1.9797 (6)   | O2—Ni1—N1               | 179.56 (5) |
| Ni1—O3 <sup>i</sup> | 2.0392 (9)   | O1—Ni1—N3 <sup>ii</sup> | 87.30 (4)  |

|                         |             |                                         |            |
|-------------------------|-------------|-----------------------------------------|------------|
| Ni1—O2                  | 2.0501 (11) | O3 <sup>i</sup> —Ni1—N3 <sup>ii</sup>   | 174.91 (4) |
| Ni1—N1                  | 2.0918 (12) | O2—Ni1—N3 <sup>ii</sup>                 | 91.49 (4)  |
| Ni1—N3 <sup>ii</sup>    | 2.1076 (11) | N1—Ni1—N3 <sup>ii</sup>                 | 88.95 (5)  |
| Ni1—N2 <sup>iii</sup>   | 2.1337 (13) | O1—Ni1—N2 <sup>iii</sup>                | 173.30 (5) |
| Angle                   | (°)         | O3 <sup>i</sup> —Ni1—N2 <sup>iii</sup>  | 87.61 (4)  |
| O1—Ni1—O3 <sup>i</sup>  | 95.55 (4)   | O2—Ni1—N2 <sup>iii</sup>                | 82.15 (5)  |
| O1—Ni1—O2               | 91.79 (4)   | N1—Ni1—N2 <sup>iii</sup>                | 97.86 (5)  |
| O3 <sup>i</sup> —Ni1—O2 | 92.63 (4)   | N3 <sup>ii</sup> —Ni1—N2 <sup>iii</sup> | 90.01 (4)  |
| O1—Ni1—N1               | 88.22 (4)   | Ni1—O1—Ni1 <sup>iv</sup>                | 119.61 (5) |

Symmetry codes: (i)  $-x, -y-1, z-1/2$ ; (ii)  $x, -y, z+1/2$ ; (iii)  $-x+1/2, -y-1/2, z+1/2$ ; (iv)  $-x, y, z$ .

Table S4 Comparison of H<sub>2</sub> Adsorption Capacities in Selected Metal-organic Frameworks at 77 K and 1.0 Bar.

| Material  | Surface Area        |          | Pore Volume        | H <sub>2</sub> Uptake | H <sub>2</sub> Q <sub>st</sub> | Ref.      |
|-----------|---------------------|----------|--------------------|-----------------------|--------------------------------|-----------|
|           | BET                 | Langmuir |                    |                       |                                |           |
|           | (m <sup>2</sup> /g) |          | cm <sup>3</sup> /g | wt%                   | kJ/mol                         |           |
| <b>1a</b> | 1489                | 1680     | 0.62               | 1.81                  | 6.5                            | This work |
| NOTT-400  | 1350                |          | 0.56               | 2.14                  | 5.96                           | 7b        |
| NOTT-401  | 1514                |          | 0.66               | 2.31                  | 6.65                           | 7b        |
| FJI-2     | 1177                | 1355     | 0.48               | 1.34                  | 7.2                            | 9         |
| ZIF-8     | 1630                | 1810     | 0.64               | 1.27                  |                                | 10        |
| SNU-6     | 2590                | 2910     | 1.05               | 1.68                  | 7.74                           | 11        |
| IRMOF-6   | 2476                | 3263     | 1.14               | 1.48                  |                                | 12        |

|        |      |      |      |      |      |    |
|--------|------|------|------|------|------|----|
| PCN-66 | 4000 | 4600 | 1.63 | 1.79 | 6.22 | 13 |
|--------|------|------|------|------|------|----|

Table S5 Comparison of CO<sub>2</sub> (273-298 K) Adsorption Capacities in Selected Metal-organic Frameworks at 1.0 Bar.

| Material  | Surface Area        |          | Pore Volume        | CO <sub>2</sub> Uptake     | CO <sub>2</sub> Q <sub>st</sub> | Ref.      |
|-----------|---------------------|----------|--------------------|----------------------------|---------------------------------|-----------|
|           | (m <sup>2</sup> /g) |          |                    |                            |                                 |           |
|           | BET                 | Langmuir | cm <sup>3</sup> /g | wt%, T                     | kJ/mol                          |           |
| <b>1a</b> | 1489                | 1680     | 0.62               | 21.3, 273 K<br>12.3, 295 K | 25.3                            | This work |
| NJU-Bai3  | 2690                | 3100     | 1.08               | 21.4, 273 K                | 36.5                            | 14        |
| PCN-80    | 3850                | 3584     | 1.47               | 19.3, 273 K<br>12.0, 296 K | 20.4                            | 15        |
| CAU-1     | 1268                |          | 0.61               | 24.1, 273 K                | 48                              | 16        |
| Cu-BTTri  | 1770                | 1900     | 0.713              | 14.3, 298 K                | 21                              | 17        |
| NOTT-140a | 2620                |          | 1.07               | 11.7, 293 K                | 24.7                            | 18        |

Table S6 Comparison of H<sub>2</sub> and CO<sub>2</sub> Adsorption Capacities of Metal-organic Frameworks with [M<sub>2</sub>(μ<sub>2</sub>-OH)(COO)<sub>2</sub>] SBUs.

| Material   | Surface Area        |          | Pore Volume        | P/T/Adsorption Capacity                                      | Ref.      |
|------------|---------------------|----------|--------------------|--------------------------------------------------------------|-----------|
|            | (m <sup>2</sup> /g) |          |                    |                                                              |           |
|            | BET                 | Langmuir | cm <sup>3</sup> /g | bar /K/wt%                                                   |           |
| <b>1a</b>  | 1489                | 1680     | 0.62               | 1/77/1.81 (H <sub>2</sub> )<br>1/273/21.3 (CO <sub>2</sub> ) | This work |
| MIL-53(Al) | 1100                |          |                    | 16/77/3.8 (H <sub>2</sub> )                                  | 19        |
| NOTT-400   | 1350                |          | 0.56               | 1/77/2.14 (H <sub>2</sub> )                                  | 7b        |
| NOTT-401   | 1514                |          | 0.66               | 1/77/2.31 (H <sub>2</sub> )                                  | 7b        |

|          |      |      |       |                               |    |
|----------|------|------|-------|-------------------------------|----|
| InOF-1   | 1065 | 1093 | 0.37  | 1/273/27.5 (CO <sub>2</sub> ) | 7c |
| NOTT-300 |      |      | 0.375 | 1/273/30.8 (CO <sub>2</sub> ) | 7d |

## References

1. M. X. Li, Z. X. Miao, M. Shao, S. W. Liang and S. R. Zhu, *Inorg. Chem.*, 2008, **47**, 4481.
2. G. M. Sheldrick, *Acta Crystallogr.*, 2008, **A64**, 112.
3. A. L. Spek, *J. Appl. Crystallogr.*, 2003, **36**, 7; P. v. d. Sluis and A. L. Spek, *Acta Crystallogr., Sect. A*, 1990, **46**, 194.
4. A. Vimont, A. Travert, P. Bazin, J.-C. Lavalley, M. Daturi, C. Serre, G. Férey, S. Bourrelly and P. L. Llewellyn, *Chem. Commun.*, 2007, 3291-3293.
5. J. L. Rowsell and O. M. Yaghi, *J. Am. Chem. Soc.*, 2006, **128**, 1304.
6. A. L. Myers, J. M. Prausnitz, *AIChE J.*, 1965, **11**, 121.
7. (a) T. Loiseau, C. Serre, C. Huguenard, G. Fink, F. Taulelle, M. Henry, T. Bataille and G. Férey, *Chem. Eur. J.*, 2004, **10**, 1373; (b) I. A. Ibarra, S. Yang, X. Lin, A. J. Blake, P. J. Rizkallah, H. Nowell, D. R. Allan, N. R. Champness, P. Hubberstey and M. Schröder, *Chem. Commun.*, 2011, **47**, 8304; (c) J. Qian, F. Jiang, D. Yuan, M. Wu, S. Zhang, L. Zhang and M. Hong, *Chem. Commun.*, 2012, **48**, 9696; (d) S. Yang, J. Sun, A. J. Ramirez-Cuesta, S. K. Callear, W. I. David, D. P. Anderson, R. Newby, A. J. Blake, J. E. Parker, C. C. Tang and M. Schroder, *Nat. Chem.*, 2012, **4**, 887.
8. I. D. Brown and D. Altermatt, *Acta Cryst. B*, 1985, **41**, 244.
9. J. Qian, F. Jiang, K. Su, J. Pan, L. Zhang, X. Li, D. Yuan and M. Hong, *J. Mater. Chem. A*, 2013, **1**, 10631.
10. K. S. Park, Z. Ni, A. P. Cote, J. Y. Choi, R. Huang, F. J. Uribe-Romo, H. K. Chae, M. O'Keeffe and O. M. Yaghi, *Proc. Natl. Acad. Sci. U.S.A.* 2006, **103**, 10186.
11. H. J. Park and M. P. Suh, *Chem. Eur. J.*, 2008, **14**, 8812.
12. J. L. C. Rowsell and O. M. Yaghi, *J. Am. Chem. Soc.*, 2006, **128**, 1304.



13. D. Q. Yuan, D. Zhao, D. F. Sun and H. C. Zhou, *Angew. Chem., Int. Ed.*, 2010, **49**, 5357.
14. J. Duan, Z. Yang, J. Bai, B. Zheng, Y. Li and S. Li, *Chem. Commun.*, 2012, **48**, 3058.
15. W. Lu, D. Yuan, T. A. Makal, J. R. Li and H. C. Zhou, *Angew. Chem., Int. Ed.*, 2012, **51**, 1580.
16. X. Si, C. Jiao, F. Li, J. Zhang, S. Wang, S. Liu, Z. Li, L. Sun, F. Xu, Z. Gabelica and C. Schick, *Energy Environ. Sci.*, 2011, **4**, 4522.
17. A. Demessence, D. M. D'Alessandro, M. L. Foo, J. R. Long, *J. Am. Chem. Soc.*, 2009, **131**, 8784.
18. C. Tan, S. Yang, N. R. Champness, X. Lin, A. J. Blake, W. Lewis and M. Schröder, *Chem. Commun.*, 2011, **47**, 4487.
19. G. Férey, M. Latroche, C. Serre, F. Millange, T. Loiseau and A. Percheron-Guegan, *Chem. Commun.*, 2003, **24**, 2976.
